# Supplementary material for: Quantitative SERS-based detection using Ag–Fe3O4 nanocomposites with an internal reference
Source: Royal Society of Chemistry journal article supplement (doi:10.1039/c4tc01550a), 2014-01-01
Supplement: c4tc01550a1.pdf [file c4tc01550a1.pdf]

Quantitative SERS-based detection using Ag-Fe<sub>3</sub>O<sub>4</sub> nanocomposites with internal reference

Padmanabh Joshi, Yan Zhou, Tevhide Ozkaya Ahmadov, Peng Zhang\*

Supporting Information

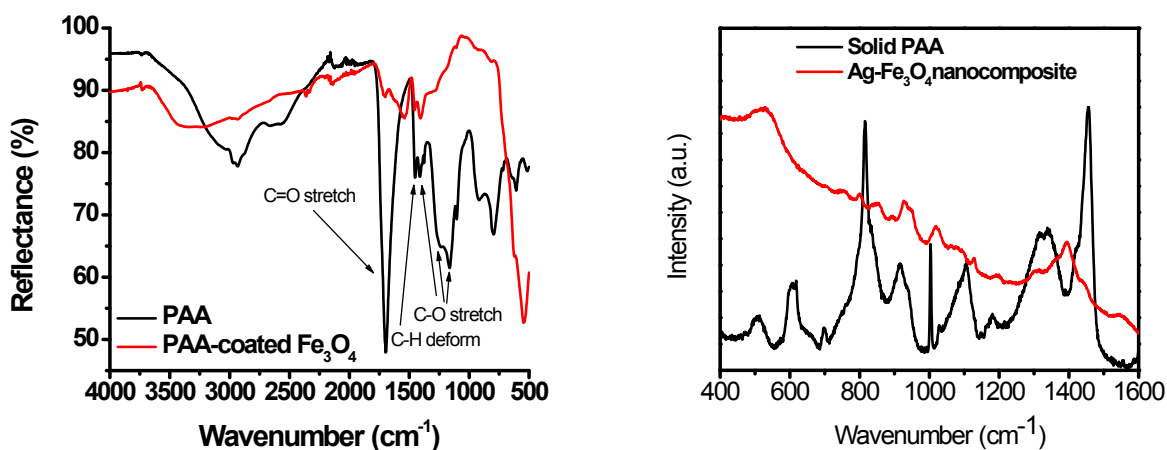

Figure S1. (Left) FT-IR spectra of PAA and PAA-coated Fe<sub>3</sub>O<sub>4</sub> nanoparticles. (Right) Raman spectra of PAA and Ag-Fe<sub>3</sub>O<sub>4</sub> nanocomposites.

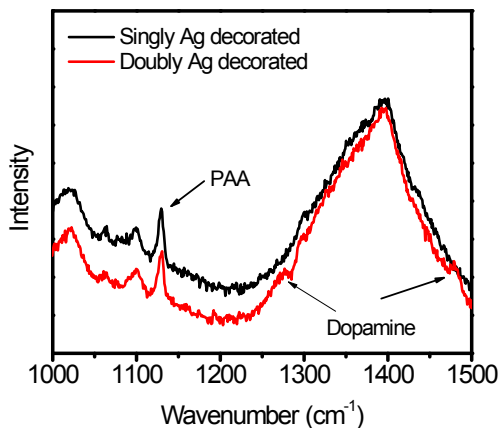

Figure S2. SERS measurements of dopamine using singly silver decorated and doubly silver decorated Ag-Fe<sub>3</sub>O<sub>4</sub> nanocomposites.

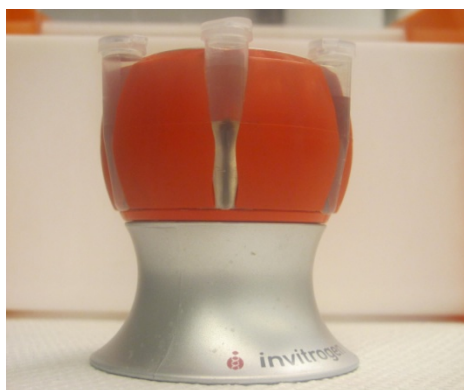

Figure S3. Demonstration of magnetic property of the Ag-Fe<sub>3</sub>O<sub>4</sub> nanocomposites.

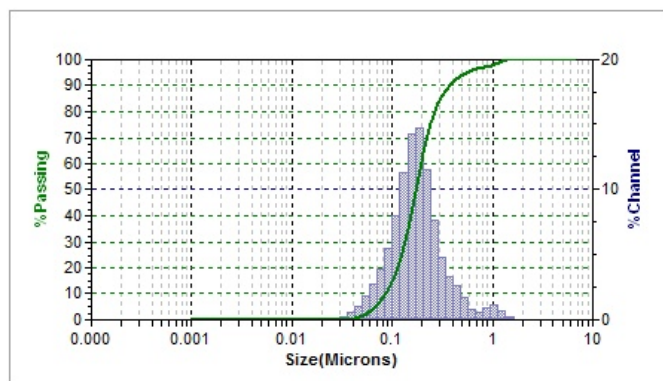

Zeta potential (mv): -9.61

Figure S4. Dynamic light scattering and zeta potential measurements of the Ag-Fe<sub>3</sub>O<sub>4</sub> nanocomposites in water.

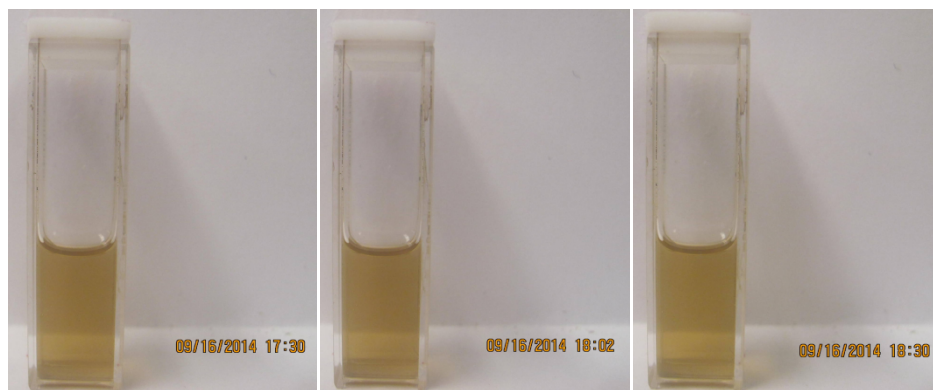

Figure S5. Photos of the Ag-Fe<sub>3</sub>O<sub>4</sub> nanocomposites in water over time showing their stability.

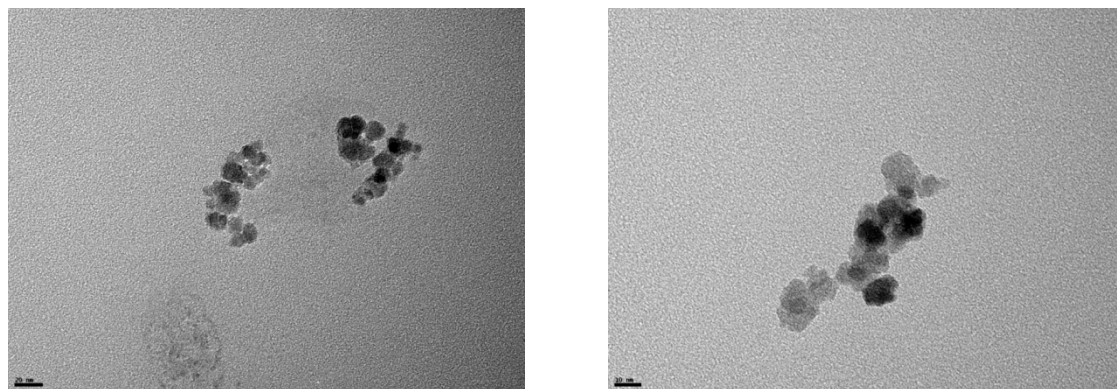

Figure S6. More TEM images of the Ag-Fe<sub>3</sub>O<sub>4</sub> nanocomposites. Scale bar is 20 nm.
